# Supplementary material for: Emotions under Discussion: Gender, Status and Communication in Online Collaboration
Source: PLOS journal article supplement (doi:10.1371/journal.pone.0104880), 2014-08-20
Supplement: S2 (10.1371/journal.pone.0104880.s002) [file journal.pone.0104880.s002]

**Table S1.** Sample sizes for the Mann-Whitney tests for article and personal talk pages.

|                                                  | Non-admins | Admins  | Total  |
|--------------------------------------------------|------------|---------|--------|
| Article talk                                     | 8 005      | 4 226   | 12 231 |
| Personal talk (written messages): LIWC           | 6 644      | 4 086   | 10 730 |
| Personal talk (received messages): LIWC          | 6 636      | 4 086   | 10 722 |
| Personal talk (written messages): SentiStrength  | 6 198      | 3 982   | 10 180 |
| Personal talk (received messages): SentiStrength | 6 198      | 3 957   | 10 155 |
|                                                  | Males      | Females | Total  |
| Article talk                                     | 2 613      | 165     | 2 778  |
| Personal talk (written messages): LIWC           | 2 446      | 160     | 2 606  |
| Personal talk (received messages): LIWC          | 2 445      | 160     | 2 605  |
| Personal talk (written messages): SentiStrength  | 2 358      | 156     | 2 514  |
| Personal talk (received messages): SentiStrength | 2 349      | 154     | 2 503  |
